# Resting high frequency heart rate variability is not associated with the recognition of emotional facial expressions in healthy human adults.

Brice Beffara<sup>1,2,3</sup>, Nicolas Vermeulen<sup>3,4</sup>, Martial Mermillod<sup>1,2</sup>

<sup>1</sup> Univ. Grenoble Alpes, LPNC, F-38040, Grenoble, France

<sup>2</sup> CNRS, LPNC UMR 5105, F-38040, Grenoble, France

<sup>3</sup> IPSY, Université Catholique de Louvain, Louvain-la-Neuve, Belgium

<sup>4</sup> Fund for Scientific Research (FRS-FNRS), Brussels, Belgium

## Author note

Correspondence concerning this article should be addressed to Brice Beffara, Office E250, Institut de Recherches en Sciences Psychologiques, IPSY - Place du Cardinal Mercier, 10 bte L3.05.01 B-1348 Louvain-la-Neuve, Belgium. E-mail: [brice.beffara@univ-grenoble-alpes.fr](mailto:brice.beffara@univ-grenoble-alpes.fr)

This study explores whether the myelinated vagal connection between the heart and the brain is involved in emotion recognition. The Polyvagal theory postulates that the activity of the myelinated vagus nerve underlies socio-emotional skills. It has been proposed that the perception of emotions could be one of this skills dependent on heart-brain interactions. However, this assumption was differently supported by diverging results suggesting that it could be related to confounded factors. In the current study, we recorded the resting state vagal activity (reflected by High Frequency Heart Rate Variability, HF-HRV) of 77 (68 suitable for analysis) healthy human adults and measured their ability to identify dynamic emotional facial expressions. Results show that HF-HRV is not related to the recognition of emotional facial expressions in healthy human adults. We discuss this result in the frameworks of the polyvagal theory and the neurovisceral integration model.

*Keywords:* HF-HRV; autonomic flexibility; emotion identification; dynamic EFEs; Polyvagal theory; Neurovisceral integration model

Word count: 9810

## 1 Introduction

2 The behavior of an animal is said social when involved in in- 20  
3 teractions with other animals (Ward & Webster, 2016). These 21  
4 interactions imply an exchange of information, signals, be- 22  
5 tween at least two animals. In humans, the face is an efficient 23  
6 communication channel, rapidly providing a high quantity of 24  
7 information. Facial expressions thus play an important role 25  
8 in the transmission of emotional information during social 26  
9 interactions. The result of the communication is the combina- 27  
10 tion of transmission from the sender and decoding from the 28  
11 receiver (Jack & Schyns, 2015). As a consequence, the quality 29  
12 of the interaction depends on the ability to both produce and 30  
13 identify facial expressions. Emotions are therefore a core 31  
14 feature of social bonding (Sporer & Kelly, 2004). Health 32  
15 of individuals and groups depend on the quality of social 33  
16 bonds in many animals (Boyer, Firat, & Leeuwen, 2015; S. L. 34  
17 Brown & Brown, 2015; Neuberg, Kenrick, & Schaller, 2011), 35

18 especially in highly social species such as humans (Singer &  
19 Klimecki, 2014).

The recognition of emotional signals produced by others is not independent from its production by oneself (Niedenthal, 2007). The muscles of the face involved in the production of a facial expressions are also activated during the perception of the same facial expressions (Dimberg, Thunberg, & Elmehed, 2000). In other terms, the facial mimicry of the perceived emotional facial expression (EFE) triggers its sensorimotor simulation in the brain, which improves the recognition abilities (Wood, Rychlowska, Korb, & Niedenthal, 2016). Beyond that, the emotion can be seen as the body -including brain- dynamic itself (Gallese & Caruana, 2016) which helps to understand why behavioral simulation is necessary to understand the emotion.

The interplay between emotion production, emotion perception, social communication and body dynamics has been summarized in the framework of the polyvagal theory (Porges,

2007). In a phylogenetic perspective, the polyvagal theory describes how the interaction between the central and the autonomic nervous systems underlie social behaviors. Heart brain interactions are the core feature of the theory because they shape the adaptation of an organism to environmental variations. Indeed, social interactions precisely generate a large amount of variability in the environment (Taborsky & Oliveira, 2012). Three major phylogenetic stages are identified in the polyvagal theory and are all associated with a specific physiological functioning. The most primitive stage is supposed common to almost all the vertebrates. The behavioral function associated is immobilization and is underpinned by the unmyelinated branch of the vagus nerve connecting the heart and the brain. This function is a defense mechanism allowing to cope with highly dangerous events. The fight/flight response to danger is assumed to have emerged during a second and more recent stage and is dependent on the sympathetic-adrenal system. Finally, the third and last stage is proposed to characterize most of the mammals. The major physiological component of this stage is the myelinated branch of the vagus nerve which underlies self-soothing and prosocial/affiliative behaviors.

The myelinated vagus nerve quickly conducts information between heart and brain resulting in modifications of heart rate and heart contraction (Coote, 2013). The vagus nerve and the heart are connected at the level of the sinus node via acetylcholine. The sinus node contains high quantity of acetylcholinesterase, the acetylcholine is rapidly hydrolyzed and the delay of vagal inputs are short (Task Force of the European Society of Cardiology the North American Society of Pacing Electrophysiology (1996); Thayer 2012a). Secondly, myelinated axonal conduction speed is high resulting in a quick reaction of the heart to the stimulation and to the stop of the stimulation (T. W. Ford & McWilliam, 1986; Jones, Wang, & Jordan, 1995; D. Jordan, 2005). High speed communication between the heart and the brain generates important variability in heart rate. This physiological variability allowed by vagal activity contributes to optimal regulation of the metabolism as a function of environmental changes and internal needs (Porges, 1997; Thayer & Sternberg, 2006).

Axons of the myelinated vagus nerve originates from preganglionic cardiac vagal neurons situated in the nucleus ambiguus (Porges, 1997). The nucleus ambiguus is a group of motor neurons from which the myelinated branch but also several sensory and motor fibers including the facial and trigeminal nerves emerge (Porges, 1998). The nucleus ambiguus has bidirectional connections with cortical (prefrontal, cingulate and insular) and sub-cortical (amygdala, hypothalamus) areas (Thayer & Lane, 2009). These regions play an important role in social cognition (Amodio & Frith, 2006) and emotional processing (Lane et al., 2009). This implies that social communication, cardiac vagal control and facial muscular control share common structural pathways. Constantly receiving updated

information from external and internal changes, the nucleus ambiguus is the place of rapid central-periphery integration and reactivity toward emotional challenges (Coote, 2013; Porges, 1995). Afferent inputs to the facial motor nucleus are found (inter alia) in the nucleus ambiguus. The distribution of motoneurons supplying fast muscle contraction might underlie the complexity and mobility of facial expressions (Sherwood, 2005). The panel of available facial expressions could be the result of dynamic connections between cortical control, brainstem nuclei sensorimotor integration/inhibition and facial muscles activity (Porges, 2001) and may foster the ability to engage and regulate diversified social interactions (Sherwood, 2005). It is to notice that this proposition made by the polyvagal theory (Porges, 2001) seems plausible but has not been developed or tested specifically at an anatomo-functional level. Indeed, an important gap remains between the functions of neural connections and social skills. Evidence toward this hypothesis is mitigated so far (Sherwood, 2005) and needs to be tested further both at anatomical, physiological and behavioral levels.

Taken together, anatomo-functional characteristics of heart-brain-face interactions allow to predict that myelinated vagus nerve activity should be associated with the ability to process emotional facial signals involved in social communication (Porges, 2003). However, even if the literature cited above strongly corroborate the hypothesis formulated by Porges (1995), measures of vagal activity and emotion signal perception have not been recorded together until Bal et al. (2010) in healthy children and autistic children and Quintana, Guastella, Outhred, Hickie, & Kemp (2012) in healthy human adults. They monitored the myelinated vagal heart-brain communication via the spectral analysis of heart rate variability which is a popular and reliable non-invasive tool reflecting the autonomic nervous system activity (Heathers, 2014; Task Force of the European Society of Cardiology the North American Society of Pacing Electrophysiology, 1996). Specifically, they extracted high frequency range of heart rate variability (HF-HRV) which provides a rigorous assessment of the myelinated heart-brain connection activity [Akselrod et al. (1981); Gary G Berntson et al. (1997); G. G. Berntson, Cacioppo, & Quigley (1993); Gary G. Berntson, Norman, Hawkey, & Cacioppo (2008); Cacioppo et al. (1994); M V Kamath & Fallen (1993); M. V. Kamath, Upton, Talalla, & Fallen (1992); M V Kamath, Upton, Talalla, & Fallen (1992)].

Bal et al. (2010) evaluated facial emotion recognition with videos of dynamic EFEs (Dynamic Affect Recognition Evaluation, DARE) on the six basic emotions (sadness, fear, surprise, disgust, anger, and happiness, Porges, Cohn, Bal, & Lamb (2007)). Videos displayed emotions going from neutral expression to apex through morphing. Quintana et al. (2012) evaluated facial emotion recognition by the Reading Mind in the Eyes Test (RMET, (Baron-Cohen, Jolliffe, Mortimore, & Robertson, 1997; Baron-Cohen, Wheelwright, Hill,

142 Raste, & Plumb, 2001)). The RMET is composed of pho-195  
143 tographs displaying the eye-region of the facial expression of196  
144 actors/actresses. The facial expressions corresponds to a feel-197  
145 ing, a thinking or mental state. The photograph is displayed198  
146 along with 4 labels describing possible mental states, among199  
147 which only one actually corresponds to the picture. The task200  
148 of the participants is therefore to “read in the mind” in order201  
149 to identify the correct mental state. The work of Quintana et al.202  
150 al. (2012) is important because no data could bring evidence203  
151 in favor of an association between vagal activity and the per-204  
152 ception of social cues in healthy humans within the polyvagal205  
153 framework (Porges, 1997) until them. The main result of206  
154 their study is that HF-HRV is associated with better scores207  
155 at the RMET, with items recoded such as correct answers208  
156 weight much for difficult trials versus easy ones. The authors209  
157 conclude that higher levels of resting state HF-HRV are asso-210  
158 ciated with better emotion recognition skills. Conversely, Bal211  
159 et al. (2010) did not find any association between HF-HRV212  
160 and emotion identification in healthy participants but only in213  
161 children with autism spectrum disorders. Besides this results214  
162 is observed only for response latency but not for accuracy)215  
163 Fear, happiness and sadness were faster identified by higher216  
164 resting-state HF-HRV participants. 217

165 On one side, Quintana et al. (2012) found that healthy adults218  
166 were better at identifying mental states (when weighting for219  
167 difficulty) and therefore proposed that HF-HRV is linked with220  
168 emotion recognition. One the other side, Bal et al. (2010)221  
169 did not find any association between HF-HRV and emotion  
170 identification (in healthy children). From here, 2 explana-222  
171 tions can emerge: i) The conceptual overlap between emotion  
172 recognition and mind reading found in Quintana et al. (2012)223  
173 matters, and HF-HRV is associated with mental state reading  
174 bu not with emotion identification *per se*, iii) Considering225  
175 healthy human participants, HF-HRV is associated with emo-  
176 tion recognition only in adults. 227  
228

177 A study mixing the designs of Bal et al. (2010) and Quintana229  
178 et al. (2012) can help to disentangle between these hypotheses230  
179 We report the results obtained after a protocol where resting231  
180 state HF-HRV is measured in healthy adults. The emotion232  
181 identification task is similar to the Dynamic Affect Recogni-233  
182 tion Evaluation software (DARE, Porges et al. (2007)) used234  
183 in Bal et al. (2010) (including anger, disgust, fear, joy, sad-235  
184 ness and surprise) but included three more EFEs (contempt236  
185 embarrassment, and pride). All EFEs movies were from the237  
186 Amsterdam Dynamic Facial Expression Set (ADFES, Schalk238  
187 Hawk, Fischer, & Doosje (2011)), a more recent database239  
188 with color stimuli. As a consequence, emotion identification240  
189 is based on a recent database with dynamic EFEs used in Bal241  
190 et al. (2010) (anger, disgust, fear, joy, sadness and surprise)242  
191 and 3 more (contempt, embarrassment, and pride) in order243  
192 to increase complexity. Even if this perspective is strongly244  
193 challenged (Jack, Sun, Delis, Garrod, & Schyns, 2016), some245  
194 authors suggest that the emotions used by Bal et al. (2010)246

are more basic and easier to identify compared to emotions  
more complex emotions such as contempt, embarrassment,  
and pride (Baron-Cohen, Golan, & Ashwin, 2009). Contempt,  
embarrassment and pride are considered as “self-conscious”  
emotions but present typical morphological configurations at  
the level of the whole face (Schalk et al., 2011). Indeed, they  
involve facial muscular patterns or even slight movement of  
the head (Tracy & Robins, 2008; Tracy, Robins, & Schriber,  
2009) and these patterns are to be decoded in order to identify  
the emotion. Albeit more complex than basic emotions, they  
differ from pure mental states because not concentrated on  
the eyes area.

As the distinction between basic and complex emotions fits  
the difference between our set of EFEs and the set used by  
Bal et al. (2010), it is relevant to rely on it as a factor of  
difficulty in EFEs recognition. Our design allows to assess  
if HF-HRV is associated with emotion recognition on a new  
set of dynamic whole EFEs. If HF-HRV is associated with  
emotion recognition in these conditions, this suggests that the  
task used by Bal et al. (2010) was not complex enough to  
establish the correlation and that HF-HRV is not discriminant  
for the recognition of “basic” emotions. On the contrary,  
if HF-HRV is not associated with emotion recognition, this  
would suggest that the results of Quintana et al. (2012) does  
not apply to emotion perception *per se* but rather to differ-  
ent “non-emotional” mechanisms involved in social signals  
reading (R. L. C. Mitchell & Phillips, 2015).

## Methods

In the “Methods” and “Data analysis” sections, we report how  
we determined our sample size, all data exclusions, all manip-  
ulations, and all measures in the study (Simmons, Nelson, &  
Simonsohn, 2012).

**Sample.** Initial sample was composed of 77 young healthy  
human adults. Participants were recruited via advertisements  
(mailing list and poster). All participants were psychology  
students of University Grenoble-Alpes. Participants were  
French or perfectly bilingual in French. They provided writ-  
ten informed consent before the participation. The study  
was part of a global project reviewed and approved by the  
University human ethics committee from Grenoble, France  
(Grenoble ethics committee notice number 2014-05-13-49  
and 2014-05-13-48). To be eligible, participants had to be  
aged between 18 and 60 years, with a normal or normal-to-  
corrected vision, explicitly reported an absence of psychiatric,  
neurologic, hormonal, or cardio-vascular disease, and with  
no medical treatment (with the exception of contraception).  
Smoking, energizing drinks (e.g. coffee, tea, etc...) and  
psychotropic substances (e.g. alcohol, cannabis, etc...) were  
prohibited to each participant the day of the experiment. They  
had also to avoid eating or drinking (water was allowed)  
the 2 hours preceding the experiment in order to limit the  
influence of digestion on autonomic functioning (Short term



247 HRV measurement can be biased by the digestion of food  
248 since viscera are innervated by the autonomic nervous system  
249 (Heathers, 2014; Iorfino, Alvares, Guastella, & Quintana,  
250 2016; Quintana & Heathers, 2014)) but they had to eat in the  
251 morning (more than 2 hours before the experiment) in order  
252 to avoid fasting states. The participants received experimental  
253 credits in return of their participation.

254 **Sample size.** We planned between 75 and 80 participants  
255 to take part in the study. Anticipating possible exclusions due to  
256 technical problems, we determined our sample size expecting  
257 at least 65 participants suitable for final analysis. This sample  
258 size was set on the basis of Quintana et al. (2012). Their  
259 sample size of 65 was adequate to observe an association  
260 between HF-HRV and the RMET score, with an effect size of  
261  $R^2 \sim .07$ .

262 **Procedure.** The experiment took place in a quiet and  
263 dimmed room. All participants were tested between 0900  
264 h and 1300 h. After a global description of the experiment,  
265 participants were asked to empty their bladder before starting  
266 the experiment. After that, they were taught how to install the  
267 Bioharness® heart rate monitor. They were left in autonomy  
268 in an isolated room for the installation of the heart rate mon-  
269 itor. Then, they seated in a chair, the experimenter checked  
270 the signal and the experiment started. The instructions were  
271 to relax, breathe naturally and spontaneously. During 5 min-  
272 utes, the participant watched short neutral samples of films  
273 selected and evaluated by Hewig et al. (2005) (“Hannah and  
274 her Sisters” and “All the President’s Men”) and Schaefer, Nils,  
275 Sanchez, & Philippot (2010) (“Blue [1]”, “Blue [2]”, “Blue  
276 [3]” and “The lover”). Videos were displayed without audio.  
277 These 5 first minutes aimed to allow the participant to shift  
278 in a calm state. ECG data for HRV baseline computation was  
279 recorded during the 5 following minutes while participants  
280 listened to the first 5 minutes of a neutral audio documentary  
281 designed for laboratory studies (Bertels, Deliens, Peigneux, &  
282 Destrebecqz, 2014). Neutral videos and audio documentary  
283 were used in order to standardize ECG recordings (Piferi,  
284 Kline, Younger, & Lawler, 2000). ECG data was recorded  
285 during spontaneous breathing (Denver, Reed, & Porges, 2007;  
286 Kobayashi, 2009; Kowalewski & Urban, 2004; Larsen, Tzeng,  
287 Sin, & Galletly, 2010; Muhtadie, Koslov, Akinola, & Mendes,  
288 2015; Pinna et al., 2007). After this first phase, the emotion  
289 identification task session started for about 15 minutes (see  
290 description below). When this step ended, the participant  
291 completed computerized control surveys. The experimenter  
292 stayed out the room during the experiment but was available  
293 for eventual questions between the different steps of the ex-  
294 periment.

295 **Emotion identification task.** The emotion identification  
296 task followed the design used by Bal et al. (2010) and pro-  
297 posed by Porges et al. (2007). Participants were presented  
298 with short video clips displaying dynamic standardized EFEs  
299 produced by humans adults. All the stimuli came from the

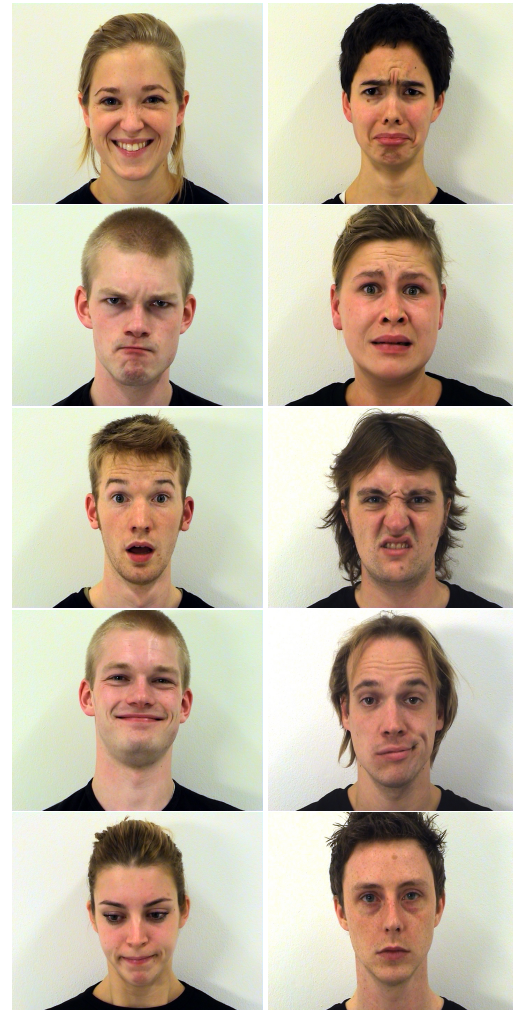

Figure 1. Examples of emotional facial expressions and of a neutral facial expression. From left to right and top to bottom: Joy (F03), Sadness (F04), Anger (M03), Fear (F05), Surprise (M02), Disgust (M04), Pride (M03), Contempt (M11), Embarrass (F01), and Neutral (M12). All stimuli are from the ADFES (van der Schalk, Hawk, Fischer, & Doosje, 2011).

ADFES (Schalk et al., 2011). Nine EFEs (Figure 1) of ten North-European models (5 males and 5 females: “F01”, “F02”, “F03”, “F04”, “F05”, “M02”, “M03”, “M04”, “M11”, and “M12”) were presented in a random design. Video clips displayed the face of the model going from a neutral expression to the apex of the EFE. Video clips duration ranged from 6 to 6.5 seconds, including a neutral face for 0.5 seconds, followed by the onset of the EFE, and then the face held at apex for 5 seconds (Figure 2). In phase 1 of each trial, participants used the numeric pad of the computer keyboard to identify EFEs. They were asked to push the “0” key as soon as they could identify what emotion was expressed in the video clip. Synchronous with the “0” key press, phase 2 started as the video clip stopped and a new screen

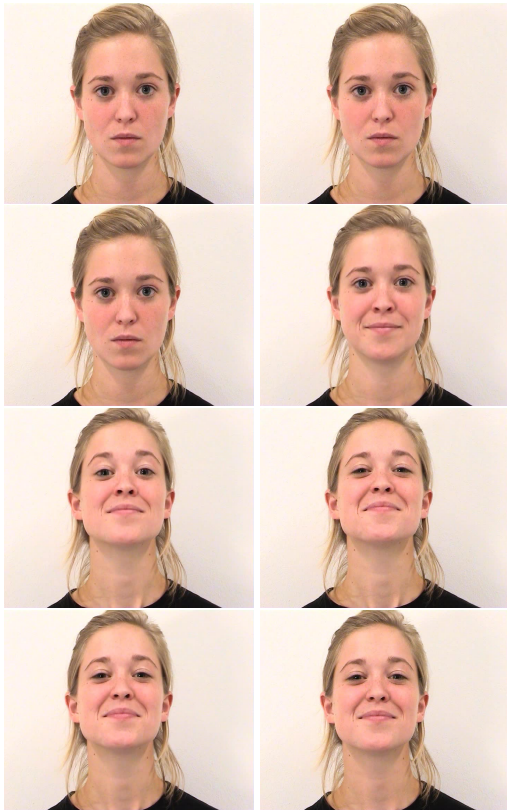

Figure 2. Time course of the EFE of pride (F03). From left to right and top to bottom,  $t = 0, 0.5, 1, 2, 3, 4, 5, 6$  seconds. Images are extracted from the original video set of the ADFES (van der Schalk, Hawk, Fischer, & Doosje, 2011).

336 processing of facial emotional signals should allow to detect  
337 more subtle muscle movements of the face and therefore  
338 identify the emotion faster. Obviously, this method could  
339 also be influenced by different strategies of response but ac-  
340 curacy scores are available in order to assess the success of  
341 the recognition. As a consequence, performances in emotion  
342 recognition can be evaluated by both measures separately.  
343 The presence of 9 instead of 6 emotions (compared to Bal et  
344 al. (2010)) allows to increase the difficulty of the task and  
345 therefore induce variability in our data. Therefore, this design  
346 is closer to the design proposed by Quintana et al. (2012)  
347 with a large number of different emotions to categorize.

348 **Physiological measurement.** The electrocardiogram  
349 (ECG) data was recorded with a Zephyr Bioharness™ 3.0  
350 (Zephyr, 2014). The Bioharness™ is a class II medical  
351 device presenting a very good precision of measurement for  
352 ECG recording in low physical activity conditions (Johnstone,  
353 Ford, Hughes, Watson, & Garrett, 2012a, 2012b; Johnstone  
354 et al., 2012). It has been used for ECG measurements in  
355 both healthy and clinical populations, presenting a very high-  
356 to-perfect correlation with classical hospital or laboratory  
357 devices (Brooks et al., 2013; Yoon, Shah, Arnoude, & De  
358 La Garza, 2014). The Bioharness™ both provides comfort  
359 for the participant and allow reliable HRV extraction for  
360 the researcher (Lumma, Kok, & Singer, 2015). The chest  
361 strap's sensor measures electrical activity corresponding to  
362 the classical V4 lead measurement (5th intercostal space  
363 at the midclavicular line) through conductive Lycra fabric.  
364 A single-ended ECG circuit detects QRS complexes and  
365 incorporates electrostatic discharge protection, both active  
366 and passive filtering and an analog-to-digital converter.  
367 Interbeat intervals are derived by Proprietary digital filtering  
368 and signal processed with a microcontroller circuit. The  
369 ECG sensor sampling frequency is 250 Hz and the resolution  
370 0.13405 mV., ranging from 0 to 0.05 V (Villarejo, Zapirain,  
371 & Zorrilla, 2013). After a slight moistening of the 2 ECG  
372 sensors, the chest-strap was positioned directly on the  
373 skin, at the level of the inframammary fold, under the  
374 lower border of the pectoralis major muscle. The recording  
375 module communicated with an Android® OS smartphone  
376 by Bluetooth®. The application used to acquire the signal  
377 emitted by the Bioharness™ was developed, tested, and  
378 validated by C novas, Domingues, & Sanches (2011). The  
379 Android® OS device used to record the signal was an  
380 LG-P990 smartphone (Android® version 4.1.2.).

314 appeared with each of the nine emotion labels matched with  
315 one the nine other number keys of the numeric pad (1-2-3-  
316 4-5-6-7-8-9). The same matching – randomly determined  
317 before the launch of the experiment – was used for all trials  
318 and for all participants (pride = 1, sadness = 2, surprise = 3,  
319 embarrassment = 4, fear = 5, joy = 6, anger = 7, contempt =  
320 8, disgust = 9). The participant was asked to identify which  
321 of the nine emotion labels corresponded to the EFE displayed  
322 in the video clip. There was no time limit nor time pressure  
323 or measure for phase 2 responses. The latency to recognize  
324 emotions was measured as the response time in phase 1. Emo-  
325 tion recognition accuracy was measured by the responses  
326 provided during phase 2. Before data recording, participants  
327 performed nine training trials on the nine EFEs of another  
328 North-European model (“M08”) in order to familiarize with  
329 the task. The experimenter stayed in the experimental room  
330 during this step in order to check if the participant understood  
331 the instructional set and possibly help the participant in case  
332 of questions and/or difficulties.

333 Response times were used as a measure of quantity of evi-  
334 dence needed in order to detect the emotion (Bal et al., 2010)  
335 In other words, the hypothesis behind is that more efficient

385 **Control for confounding factors.** To control for confound-  
386 ing variables likely to be linked to HRV, participants com-  
387 pleted questionnaires detailing life habits, demographic data  
388 and emotional traits (Quintana et al., 2012). Physical activity  
389 was assessed with the International Physical Activity Ques-  
390 tionnaire (IPAQ, Craig et al. (2003)), composed of 9 items that  
391 calculate an index reflecting the energy cost of physical activ-  
392 ities (Metabolic Equivalent Task score, MET). The IPAQ has



389 been validated in French (Briancon et al., 2010; Hagströmer,<sup>440</sup>  
390 Oja, & Sjöström, 2006) and widely used in French surveys  
391 (Salanave et al., 2012). Participants also completed the De-<sup>441</sup>  
392 pression Anxiety and Stress scales (DASS-21;(P. F. Lovibond<sup>442</sup>  
393 & Lovibond, 1995)). The DASS-21 is a 21-item question-<sup>443</sup>  
394 naire, validated in French (Ramasawmy & Gilles, 2012), and<sup>444</sup>  
395 composed of three subscales evaluating depression, anxiety<sup>445</sup>  
396 and stress traits. We also recorded the size, weight, age and<sup>446</sup>  
397 sex of the participants and their daily cigarette consumption.<sup>447</sup>  
398 Participants answered final surveys on a DELL latitude E6500<sup>448</sup>  
399 laptop. Surveys were built and displayed with E-prime soft-<sup>449</sup>  
400 ware (E-prime 2.0.10.242 pro).<sup>450</sup>

401 **Physiological signal processing.** R-R interval data was ex-<sup>451</sup>  
402 tracted from the Android® device and imported into RHRV<sup>452</sup>  
403 for Ubuntu (Rodríguez-Liñares et al., 2011). Signal was vi-<sup>453</sup>  
404 sually inspected for artifact (Prinsloo et al., 2011; Quintana<sup>454</sup>  
405 et al., 2012; Wells, Outhred, Heathers, Quintana, & Kemp,<sup>455</sup>  
406 2012). Ectopic beats were discarded (Kemper, Hamilton, &<sup>456</sup>  
407 Atkinson, 2007) for participants presenting a corrupted RR<sup>457</sup>  
408 interval series (Beats per minute (bpm) shorter/longer than<sup>458</sup>  
409 25/180 and/or bigger/smaller than 13% compared to the 50<sup>459</sup>  
410 last bpm). RR series were interpolated by piecewise cubic<sup>460</sup>  
411 spline to obtain equal sampling intervals and regular spectrum<sup>461</sup>  
412 estimations. A sampling rate of 4 Hz was used. We then<sup>462</sup>  
413 extracted the frequency component of HRV from RR interval<sup>463</sup>  
414 data. The LF (0.04-0.15 Hz) and HF (0.15-0.4 Hz) compo-<sup>464</sup>  
415 nents were extracted using an east asymmetric Daubechies<sup>465</sup>  
416 wavelets with a length of 8 samples. Maximum error allowed<sup>466</sup>  
417 was set as 0.01 (García, Otero, Vila, & Márquez, 2013).<sup>467</sup>

418 **Model comparison.** Model selection was completed using<sup>468</sup>  
419  $AIC_c$  (corrected Akaike information criterion) and Evidence<sup>469</sup>  
420 Ratios  $-ER_i$ - (K. P. Burnham & Anderson, 2004; Kenneth P.<sup>470</sup>  
421 Burnham, Anderson, & Huyvaert, 2011; Hegyi & Garamszegi,<sup>471</sup>  
422 2011; Symonds & Moussalli, 2011).  $AIC_c$  provides a relative<sup>472</sup>  
423 measure of goodness-of-fit but also of parsimony by sanction-<sup>473</sup>  
424 ing models for their numbers of parameters.  $AIC_c$  is more

425 severe on this last point than AIC ( $AIC_c = AIC + \frac{2K(K+1)}{n-K-1}$ )  
426 where  $K$  is the number of parameters and  $n$  the sample  
427 size.). We computed the difference between best (lower)  
428 and other  $AIC_c$ s with  $\Delta AIC_c = AIC_{c_i} - AIC_{c_{min}}$ . The weight of

429 a model is then expressed as  $w_i = \frac{e^{\frac{1}{2}\Delta AIC_{c_i}}}{\sum_r e^{\frac{1}{2}\Delta AIC_{c_r}}}$ . From there,  
430 we can compute the Evidence Ratio:  $ER_i = \frac{w_{best}}{w_i}$ . Even

431 if quantitative information about evidence is more precise,  
432 we also based our decision on Kass & Raftery (1995) and  
433 Snipes & Taylor (2014), i.e. minimal ( $ER_i < 3.2$ ), substantial  
434 ( $3.2 < ER_i < 10$ ), strong ( $10 < ER_i < 100$ ) and decisive  
435 ( $100 < ER_i$ ) evidence. If the model with the lower  $AIC_c$   
436 included more parameters than others, we considered it as  
437 relevant if the evidence was at least substantial. If the model  
438 with the lower  $AIC_c$  included less parameters than others, we  
439 chose it even if evidence was minimal.

## Results

Correlations between control variables and variables of interest are displayed in figures 3 and 4. Because weight was associated with HF-HRV, we adjusted HF-HRV for it by extracting the standardized residuals of the regression with weight as the independent variable and HF-HRV as the dependent variable (Quintana et al., 2012). HRV as an independent variable in the following analysis is therefore HF-HRV (normalized units) adjusted for weight.

In a second step, we selected the relevant random factors to include in our models. Whether for response times or accuracy, participants and items (i.e. the model (actor) performing the EFE) were appropriate as random factors. Indeed models including participants and items showed the lowest (best)  $AIC_c$  with  $ER_i = 0.936/0.064 = 14.62$  (strong evidence) for response times (Table 1) and  $ER_i = 0.967/0.033 = 29.30$  (strong evidence) for accuracy (Table 2).

We then compared the parsimony of models containing main effects (HF-HRV and emotion type) and interaction effects. Model comparison showed no evidence in favor of a main effect of HF-HRV or toward an interaction between HRV and emotion compared to the intercept model, either for response times or accuracy (tables 3 and 4). HF-HRV did not predict performance in emotion identification. This absence of effect was observed regardless of the emotion type (“complex” versus “basic”). There was minimal evidence ( $ER_i = 0.631/0.211 = 2.99$  for response times and  $ER_i = 0.596/0.194 = 3.07$  for accuracy) toward and principal effect of emotion type compared to the second best model and decisive evidence compared to the intercept model (Figure 5) with a marginal  $R^2$  of .06 and .05 respectively. Overall emotions absent from Bal et al. (2010) (i.e. “complex emotions”) were more difficult to identify compared to the emotion they used (i.e. “basic” emotions).

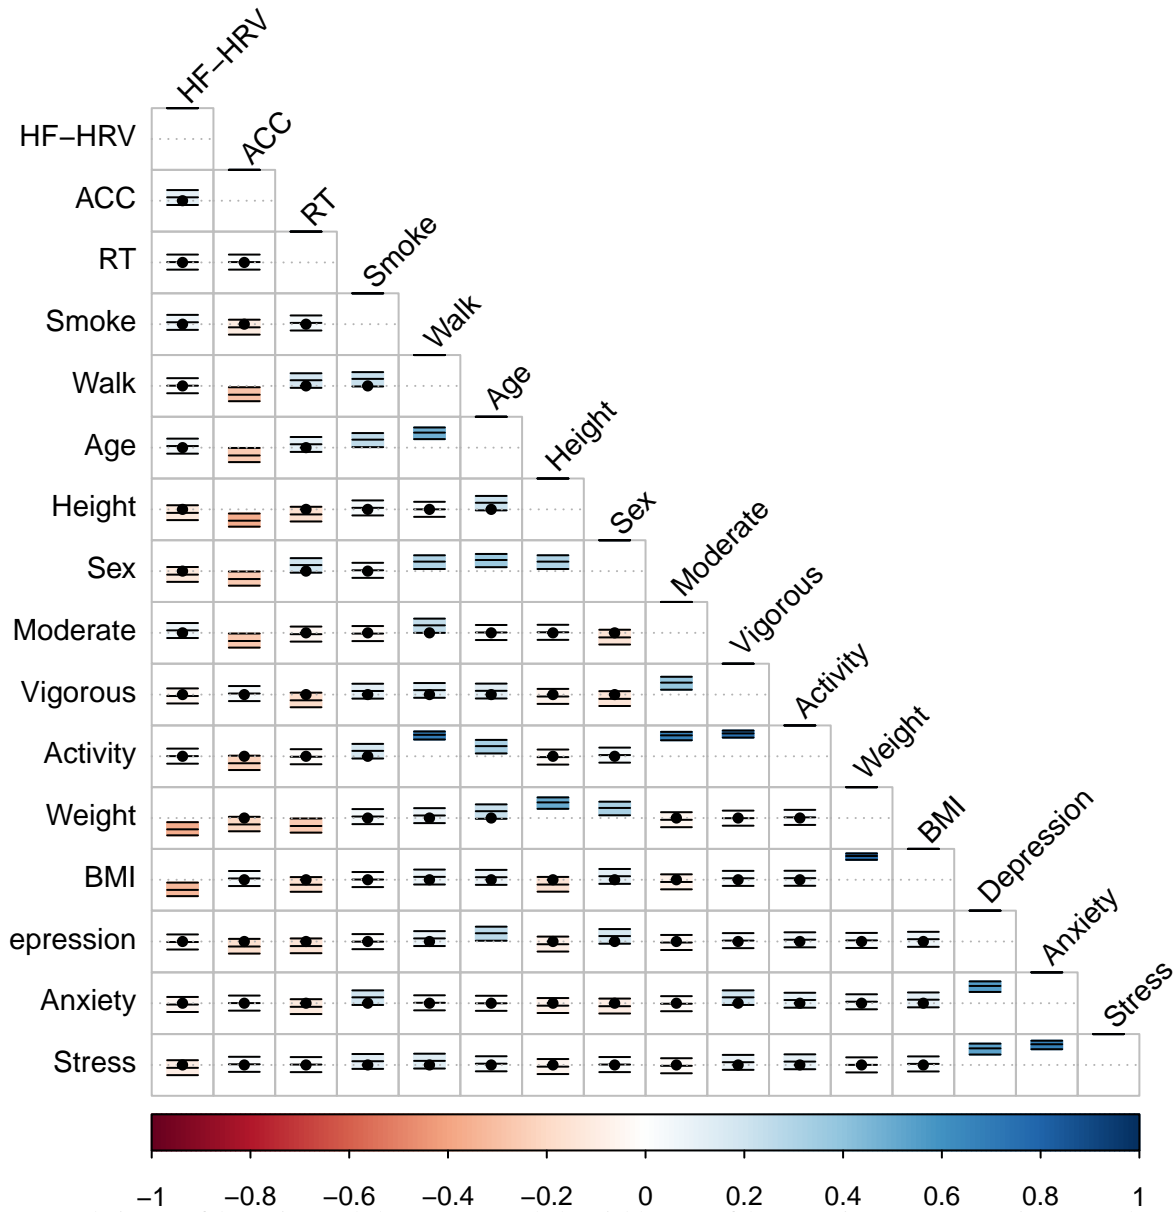

Figure 3. Correlation confidence intervals between recorded variables. Confidence regions represent 95% CIs and are marked with a black dot when including 0.

Table 1

Comparison of random effects in models for response times, ordered by AICc relative to the model with the lowest (best) AICc.

|                                         | <i>K</i> | <i>AICc</i> | $\Delta_{AICc}$ | <i>Weight</i> |
|-----------------------------------------|----------|-------------|-----------------|---------------|
| <i>ppt + item</i>                       | 4        | 77486       | 0               | 0.936         |
| <i>ppt + item + HRV<sub>slope</sub></i> | 7        | 77491       | 5.366           | 0.064         |
| <i>ppt</i>                              | 3        | 77563       | 77.37           | 0             |
| <i>item</i>                             | 3        | 78383       | 896.9           | 0             |

474 Note. *K* is the number of parameters in the model. *ppt*=participants, *item* = model of the video clip, *HRV<sub>slope</sub>* = random by-participant  
 475 variation in the slope of HF-HRV. Nb. All other random slope models failed to converge.

476

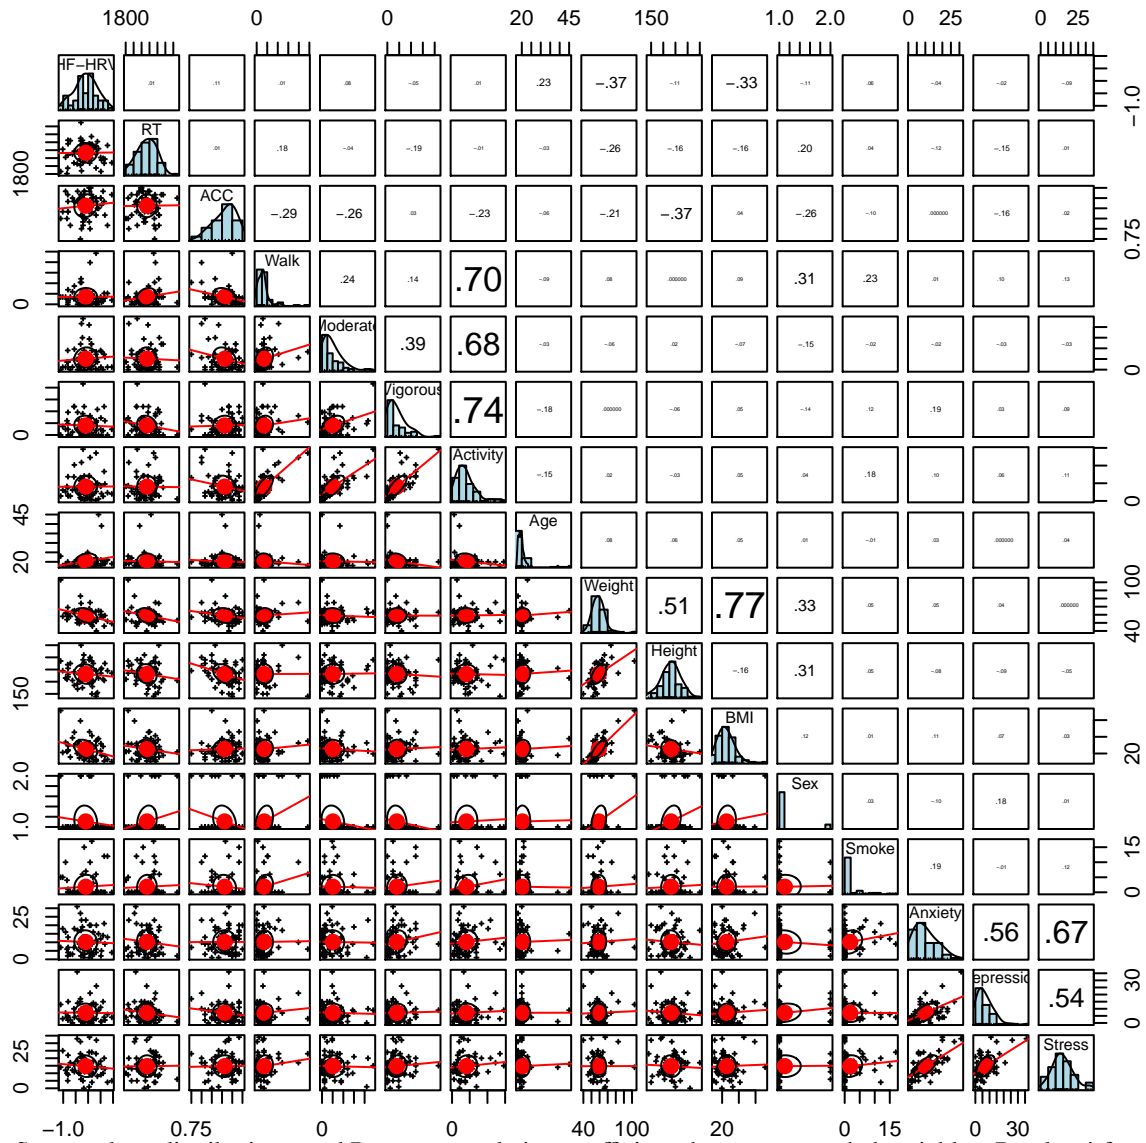

Figure 4. Scatter plots, distributions, and Pearson correlation coefficients between recorded variables. R values' font sizes are proportional to the strength of the correlation.

Table 2

Comparison of random effects in models for accuracy, ordered by AICc relative to the model with the lowest (best) AICc.

|                            | $K$ | $AICc$ | $\Delta AICc$ | Weight |
|----------------------------|-----|--------|---------------|--------|
| $ppt + item$               | 3   | 4463   | 0             | 0.967  |
| $ppt + item + HRV_{slope}$ | 6   | 4469   | 6.739         | 0.033  |
| $ppt$                      | 2   | 4494   | 31.66         | 0      |
| $item$                     | 2   | 4516   | 53.21         | 0      |

477 Note.  $K$  is the number of parameters in the model.  $ppt$ =participants,  $item$  = model of the video clip,  $HRV_{slope}$  = random by-participant  
478 variation in the slope of HF-HRV. Nb. All other random slope models failed to converge.



Table 3

Comparison of models for response times, ordered by AICc relative to the model with the lowest (best) AICc.

|                                                                              | <i>K</i> | <i>AICc</i> | $\Delta_{AICc}$ | <i>Weight</i> |
|------------------------------------------------------------------------------|----------|-------------|-----------------|---------------|
| <i>Int + Emo</i>                                                             | 5        | 77089       | 0               | 0.63          |
| <i>Int + HRV + Emo</i>                                                       | 6        | 77091       | 2.188           | 0.21          |
| <i>Int + HRV + Emo + HRV * Emo</i>                                           | 7        | 77093       | 4.567           | 0.06          |
| <i>Int + HRV<sup>2</sup> + Emo + HRV<sup>2</sup> * Emo</i>                   | 7        | 77093       | 4.567           | 0.06          |
| <i>Int + HRV + HRV<sup>2</sup> + Emo + HRV * Emo + HRV<sup>2</sup> * Emo</i> | 9        | 77095       | 6.202           | 0.02          |
| <i>Int</i>                                                                   | 4        | 77486       | 396.9           | 0             |
| <i>Int + HRV<sup>2</sup></i>                                                 | 5        | 77486       | 397             | 0             |
| <i>Int + HRV</i>                                                             | 5        | 77488       | 399             | 0             |
| <i>Int + HRV * Emo</i>                                                       | 5        | 77488       | 399.1           | 0             |
| <i>Int + HRV + HRV<sup>2</sup></i>                                           | 6        | 77488       | 399.1           | 0             |

479 Note. *K* is the number of parameters in the model. *Int* = Intercept, *HRV* = resting HF-HRV, *Emo* = Type of emotion (present in Bal et al.  
480 (2010) versus not). All models include participants and items as random factors.

481

Table 4

Comparison of models for accuracy, ordered by AICc relative to the model with the lowest (best) AICc.

|                                                                              | <i>K</i> | <i>AICc</i> | $\Delta_{AICc}$ | <i>Weight</i> |
|------------------------------------------------------------------------------|----------|-------------|-----------------|---------------|
| <i>Int + Emo</i>                                                             | 4        | 4339        | 0               | 0.59          |
| <i>Int + HRV + Emo</i>                                                       | 5        | 4341        | 2.243           | 0.19          |
| <i>Int + HRV + Emo + HRV * Emo</i>                                           | 6        | 4343        | 3.994           | 0.08          |
| <i>Int + HRV<sup>2</sup> + Emo + HRV<sup>2</sup> * Emo</i>                   | 6        | 4343        | 3.994           | 0.08          |
| <i>Int + HRV + HRV<sup>2</sup> + Emo + HRV * Emo + HRV<sup>2</sup> * Emo</i> | 8        | 4344        | 5.03            | 0.04          |
| <i>Int</i>                                                                   | 3        | 4463        | 123.8           | 0             |
| <i>Int + HRV<sup>2</sup></i>                                                 | 4        | 4464        | 125.1           | 0             |
| <i>Int + HRV * Emo</i>                                                       | 4        | 4464        | 125.3           | 0             |
| <i>Int + HRV</i>                                                             | 4        | 4465        | 126             | 0             |
| <i>Int + HRV + HRV<sup>2</sup></i>                                           | 5        | 4466        | 127.4           | 0             |

482 Note. *K* is the number of parameters in the model. *Int* = Intercept, *HRV* = resting HF-HRV, *Emo* = Type of emotion (present in Bal et al.  
483 (2010) versus not). All models include participants and items as random factors.

484

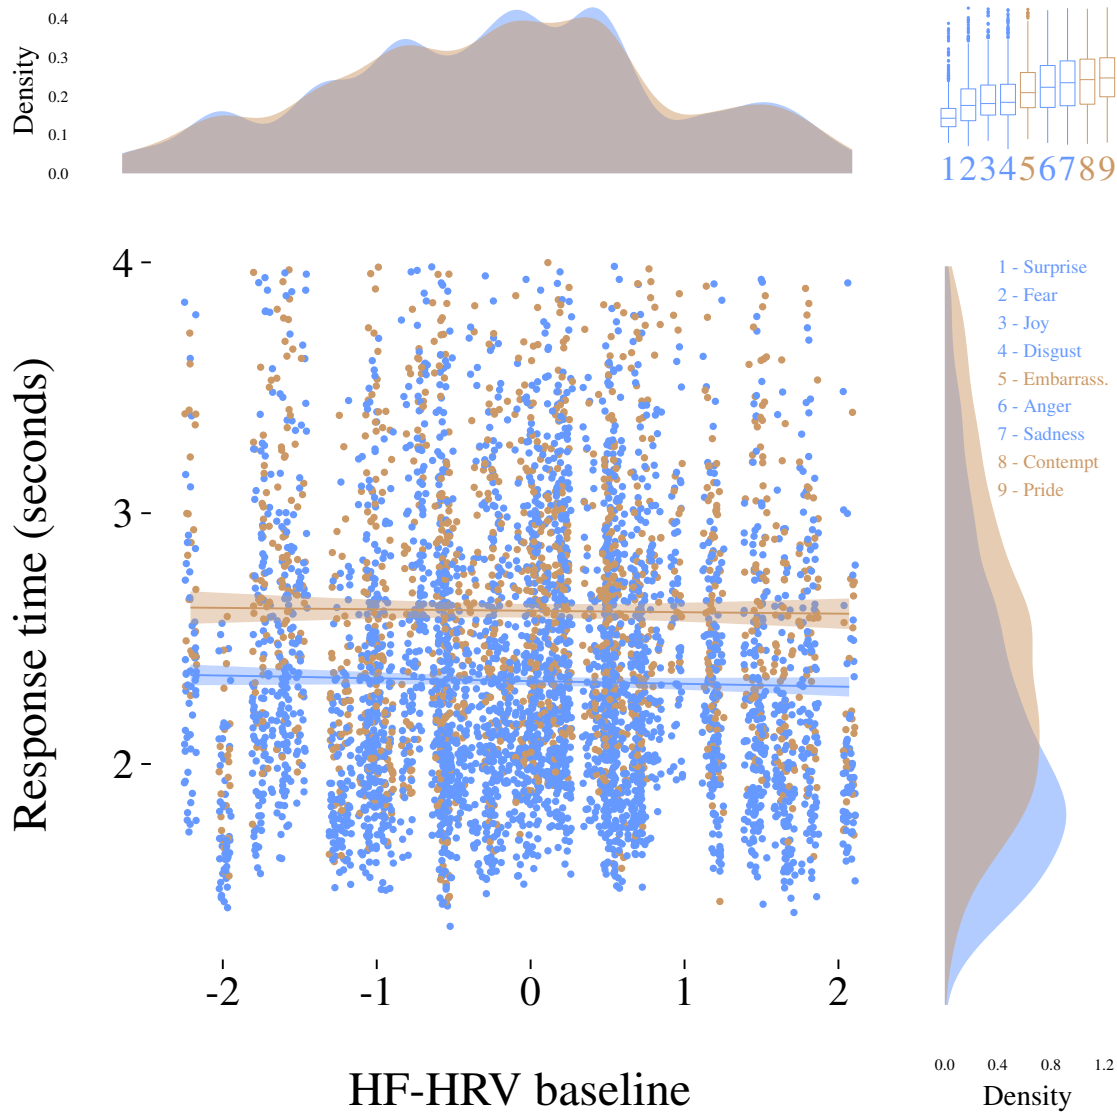

Figure 5. Response time for emotion identification as a function of resting HF-HRV and emotion type. Confidence regions represent 95% CIs. The top-right plot represents the ranking of the median response times relative to each EFes.

## Discussion

We carried out a study in order to test whether HF-HRV was associated with better decoding of emotional facial expressions. Our protocol was built in order to combine the properties of previous studies on this subject (Bal et al., 2010; Quintana et al., 2012). We were able to measure reaction times and accuracy in an EFes recognition task with both “basic” and “self-conscious” emotions (Schalk et al., 2011). In line with the observations of Bal et al. (2010), our results show that HF-HRV is not associated with better recognition of “basic” emotions. While “self-conscious” emotions were harder to identify than “basic” emotions, the performance of participants was not predicted by HF-HRV. HF-HRV does not predict emotion identification on dynamic videos of whole faces, even taking difficulty into account.

The polyvagal theory predicts that the myelinated vagal connection between the heart and the brain can foster the perception of social cues in mammals (Porges, 2007). Quintana et al. (2012) showed that this feature of heart-brain interactions (as indexed by HF-HRV) is indeed associated with better performances at the RMET in healthy human adults. It is generally admitted that the RMET measures the ability to read other’s mental states. The association between HF-HRV and RMET performances can be interpreted as better emotion recognition skills in higher HF-HRV participants (Quintana et al., 2012). However, emotion recognition is not the only mechanism necessary to read other’s mental states. Attentional shifting and inhibition play a large part in Theory of Mind (ToM) i.e. the ability to attribute mental states to others (R. L. C. Mitchell & Phillips, 2015; Poletti, Enrici, & Adenzato, 2012; Samson, 2009). Several theoretical perspective have proposed a framework describing the interplay between emotion perception and ToM. Many of them propose the distinction between decoding the emotion from external stimulation and understanding its meaning for the other person (R. L. C. Mitchell & Phillips, 2015). This second step is likely to require inhibition of one’s perspective, rapid information updating, working memory, attentional switching between one’s and the other’s state (Carlson, Moses, & Breton, 2002; R. L. C. Mitchell & Phillips, 2015; Poletti et al., 2012; Samson, 2009).

As a consequence, the association between HF-HRV and mind reading could also be explained by better executive skills and not necessarily by better emotion identification abilities. Indeed, Bal et al. (2010) showed that HF-HRV was not associated with emotion recognition in healthy human children. They used an emotion categorization task with dynamic EFes on six emotions (Porges et al., 2007). Still, it was not possible to put the work of Bal et al. (2010) and Quintana et al. (2012) in perspective because i) the population of interest was different (children vs. adults) and ii) the association between HF-HRV and RMET performances was observed when taking the items’ difficulty into account: it could be argued that the difficulty of the task in Bal et al. (2010) did not allow to discriminate the association with HF-HRV. We designed a study inspired from Bal et al. (2010) but tested healthy human adults and increased the difficulty of the task by adding three more EFes to categorize. Model comparison by AICc showed that models without HF-HRV as a parameter were always far more parsimonious than models including HF-HRV as a parameter. This was observable for reaction times, accuracy, linear and quadratic shapes, even taking the difficulty of the task into account. This design allowed to discriminate between models with and without HF-HRV, that is to say, the parsimony of the models without HF-HRV was always clearly superior to the models with HF-HRV. This support the fact that HF-HRV is not associated with emotion recognition skills.

On the basis of these results, we propose that the association between HF-HRV and performances in “mental states” reading (Quintana et al., 2012) cannot be explained by better emotion recognition skills. The more plausible explanation at this stage would rather take attentional, working memory and executive skills into account. Interestingly, recent studies clearly show that higher HF-HRV individuals perform better in many cognitive tasks depending on executive and attentional functioning. The neurovisceral integration model provides a theoretical framework (Thayer & Lane, 2000) allowing to understand the association between HF-HRV and attention. The neural control of the heart is highly dependent on cortical inputs especially from the prefrontal cortex (PFC), the insula, and the anterior cingulate cortex (ACC). Variability observed in heart rate and mediated by the functioning of the myelinated vagus nerve is therefore largely influenced by attentional shifts, conflict monitoring, and inhibition. Conversely, it is also likely that afferent feed-backs from the heart can influence the central nervous system, therefore creating dynamic loops between the heart and the brain, fostering the adaptation of the organisms to internal and external demands. Neuroimaging studies bring evidence toward an important overlap between central nervous system activities associated with HRV (Thayer, Åhs, Fredrikson, Sollers, & Wager, 2012) and with ToM (Schurz, Radua, Aichhorn, Richlan, & Perner, 2014). The medial PFC (mPFC), the insula and the ACC play a large part in cardiovascular control and ToM. These areas show connections with the temporo-parietal junction (TPJ). It has been suggested that the TPJ is mainly involved in inferences about short-term intentions while more durable mental states could rather be taken over by the mPFC (Van Overwalle, 2009). The mPFC is also involved in inhibitory functions and interconnected with the ACC associated with cognitive control and conflict monitoring and with the insula underlying body states integration (Lane et al., 2009; Mier et al., 2010; Reeck, Ames, & Ochsner, 2016; Thayer & Lane, 2009). Therefore, brain areas involved in cardiovascular control and characterizing differences in HRV are often found associated with executive functioning, attentional regulation,



591 and switching between one's and other's body states rather  
592 than emotion identification. 645

593 Even if we did not measure sensorimotor activity of the face  
594 during the tasks, we made the hypothesis that sensorimotor  
595 simulation would play an important part in the detection of  
596 emotions (Wood et al., 2016). This hypothesis was important  
597 in order to test the polyvagal proposition (Porges, 2001) ac-  
598 cording to which neural cardiovascular control is associated  
599 with neural sensorimotor control of the head and face mus-  
600 cles, both at an anatomical and at a functional level. In this  
601 perspective, our result does not validate that HF-HRV and  
602 sensorimotor skills are associated in order to perform a per-  
603 ceptive task such as decoding EFES. Thus, it is plausible that  
604 HF-HRV predicts social skills (Beffara, Bret, Vermeulen, &  
605 Mermillod, 2016; Miller, Kahle, & Hastings, 2015) at another  
606 level. Attentional skills have already been suggested as the  
607 cognitive mechanism linking HF-HRV and social functioning  
608 (Keltner, Kogan, Piff, & Saturn, 2014). Obviously, we did  
609 not test this hypothesis in this study. However, as attention  
610 is a strong necessity to apply theory of mind (Lin, Keysar, &  
611 Epley, 2010) aside from decoding facial patterns, it is likely  
612 that the ability of higher HF-HRV individuals to process social  
613 signals is not due to better sensori-motor control but rather to  
614 better attentional or executive skills (Park & Thayer, 2014).  
615 Obviously, this proposition still needs to be specifically tested

616 A solid set of studies highlight the association between HF-  
617 HRV and working memory (Hansen, Johnsen, & Thayer,  
618 2003; Hansen, Johnsen, Sollers, Stenvik, & Thayer, 2004),  
619 inhibition and attention switching (Kimhy et al., 2013), and  
620 more flexible attentional engagement and disengagement to-  
621 ward negative emotional stimuli (Park & Thayer, 2014; Park,  
622 Van Bavel, Vasey, Egan, & Thayer, 2012; Park, Vasey, Van  
623 Bavel, & Thayer, 2013). Consequently, whether at neuroimag-  
624 ing or behavioral level, better cognitive skills associated with  
625 higher resting state HF-HRV appear to be a more reliable  
626 candidate for explaining more accurate mind reading, while  
627 emotion identification abilities did not show substantial as-  
628 sociation with HF-HRV in our study. While further studies  
629 are needed to clearly establish the mediation of the HF-HRV  
630 ToM link by executive functioning, we suggest that domain-  
631 general cognitive mechanisms (C. Heyes, 2014; Cecilia Heyes,  
632 2016a, 2016b; Cecilia Heyes & Pearce, 2015) should be con-  
633 sidered when studying in the functional association between  
634 HF-HRV and the social life. 681

635 **Conclusions.** Heart-brain interactions are proposed to un-  
636 derlie socio-emotional skills (Porges, 2007). It has been  
637 shown that resting HF-HRV is associated with mental states  
638 reading (Quintana et al., 2012). These authors suggested that  
639 HF-HRV was linked to emotion recognition abilities. How-  
640 ever, the current study does not allow to conclude that resting  
641 HF-HRV predict emotion recognition, even taking emotion  
642 type into account. Further studies should examine the role of  
643 executive functioning as a mediator of the HF-HRV – ToM

association. Domain-general cognitive skills could account  
for the role of HF-HRV in social functioning.

**Acknowledgements.** We thank Amélie Baldini and Elie Bes  
for technical support in data collection. We also thank all  
the participants for taking part in the study. We thank Pierre  
Maurage and Delphine Grynberg for their useful comments  
and constructive remarks. This research was funded by the  
french CNRS and the Institut Universitaire de France.

## References

- Akselrod, S., Gordon, D., Ubel, F. F., Shannon, D. D.,  
Berger, A., Cohen, R. R., ... Cohen, R. R.  
(1981). Power spectrum analysis of heart rate fluctu-  
ation: a quantitative probe of beat-to-beat car-  
diovascular control. *Science*, 213(4504), 220–22.  
doi:10.1126/science.6166045
- Amodio, D. M., & Frith, C. D. (2006). Meeting of  
minds: the medial frontal cortex and social cogni-  
tion. *Nature Reviews. Neuroscience*, 7(4), 268–77.  
doi:10.1038/nrn1884
- Bal, E., Harden, E., Lamb, D., Van Hecke, A. V., Denver, J.  
W., & Porges, S. W. (2010). Emotion recognition  
in children with autism spectrum disorders: Rela-  
tions to eye gaze and autonomic state. *Journal of  
Autism and Developmental Disorders*, 40(3), 358–  
370. doi:10.1007/s10803-009-0884-3
- Baron-Cohen, S., Golan, O., & Ashwin, E. (2009). Can emo-  
tion recognition be taught to children with autism  
spectrum conditions? *Philosophical Transactions of  
the Royal Society B: Biological Sciences*, 364(1535),  
3567–3574. doi:10.1098/rstb.2009.0191
- Baron-Cohen, S., Jolliffe, T., Mortimore, C., & Robertson, M.  
(1997). Another advanced test of theory of mind: Ev-  
idence from very high functioning adults with autism  
or Asperger syndrome. *Journal of Child Psychology  
and Psychiatry and Allied Disciplines*, 38(7), 813–  
822. doi:10.1111/j.1469-7610.1997.tb01599.x
- Baron-Cohen, S., Wheelwright, S., Hill, J., Raste, Y., &  
Plumb, I. (2001). The “Reading the Mind in the  
Eyes” Test revised version: a study with normal  
adults, and adults with Asperger syndrome or high-  
functioning autism. *Journal of Child Psychology  
and Psychiatry, and Allied Disciplines*, 42(2), 241–  
51. doi:10.1111/1469-7610.00715
- Beffara, B., Bret, A. G., Vermeulen, N., & Mermil-  
lod, M. (2016). Resting high frequency heart  
rate variability selectively predicts cooperative be-  
havior. *Physiology & Behavior*, 164, 417–428.

- doi:[10.1016/j.physbeh.2016.06.011](https://doi.org/10.1016/j.physbeh.2016.06.011) 738
- 691  
692 Berntson, G. G., Bigger Jr., T., Eckberg, D. L., Grossman, P.,  
693 Kaufmann, P. G., Malik, M., . . . Molen, M. W. van 740  
694 der. (1997). Heart rate variability: origins, methods, 741  
695 and interpretive caveats. *Psychophysiology*, *34*(6), 742  
696 623–648. doi:[10.1111/j.1469-8986.1997.tb02140.x](https://doi.org/10.1111/j.1469-8986.1997.tb02140.x) 743
- 697 Berntson, G. G., Cacioppo, J. T., & Quigley, K. S. (1993). 744  
698 Respiratory sinus arrhythmia: Autonomic origins,  
699 physiological mechanisms, and psychophysiological 746  
700 implications. *Psychophysiology*, *30*(2), 183–196 747  
701 doi:[10.1111/j.1469-8986.1993.tb01731.x](https://doi.org/10.1111/j.1469-8986.1993.tb01731.x) 748
- 702 Berntson, G. G., Norman, G. J., Hawkey, L. C., & Cacioppo, 749  
703 J. T. (2008). Cardiac autonomic balance versus car- 750  
704 diac regulatory capacity. *Psychophysiology*, *45*(4), 751  
705 643–652. doi:[10.1111/j.1469-8986.2008.00652.x](https://doi.org/10.1111/j.1469-8986.2008.00652.x) 752
- 706 Bertels, J., Deliens, G., Peigneux, P., & Destrebecqz, A. 753  
707 (2014). The Brussels Mood Inductive Audio Sto- 754  
708 ries (MIAS) database. *Behavior Research Methods*, 755  
709 1098–1107. doi:[10.3758/s13428-014-0445-3](https://doi.org/10.3758/s13428-014-0445-3) 756
- 710 Boyer, P., Firat, R., & Leeuwen, F. van. (2015). Safety, Threat, 757  
711 and Stress in Intergroup Relations: A Coalitional In- 758  
712 dex Model. *Perspectives on Psychological Science*, 759  
713 *10*(4), 434–450. doi:[10.1177/1745691615583133](https://doi.org/10.1177/1745691615583133) 760
- 714 Briancon, S., Bonsergent, E., Agrinier, N., Tessier, S., 761  
715 Legrand, K., Lecomte, E., . . . (ptg), P. T. G. (2010).  
716 PRALIMAP: study protocol for a high school-based 763  
717 factorial cluster randomised interventional trial of 764  
718 three overweight and obesity prevention strategies 765  
719 *Trials*, *11*(1), 119. doi:[10.1186/1745-6215-11-119](https://doi.org/10.1186/1745-6215-11-119) 766
- 720 Brooks, K. A., Carter, J. G., Dawes, J. J., A Brooks, K., 767  
721 Brooks, K. A., Carter, J. G., . . . Dawes, J. J. (2013) 768  
722 A Comparison of VO<sub>2</sub> Measurement Obtained by a 769  
723 Physiological Monitoring Device and the Cosmed 770  
724 Quark CPET. *Journal Of Novel Physiotherapies*, 771  
725 *3*(3), 1–2. doi:[10.4172/2165-7025.1000126](https://doi.org/10.4172/2165-7025.1000126) 772
- 726 Brown, S. L., & Brown, R. M. (2015). Connecting proso- 773  
727 cial behavior to improved physical health: Contri- 774  
728 butions from the neurobiology of parenting. *Neu- 775*  
729 *rosience and Biobehavioral Reviews*, *55*, 1–17.  
730 doi:[10.1016/j.neubiorev.2015.04.004](https://doi.org/10.1016/j.neubiorev.2015.04.004) 776
- 731 Burnham, K. P., & Anderson, R. (2004). Multimodel In- 778  
732 ference: Understanding AIC and BIC in Model Se- 779  
733 lection. *Sociological Methods & Research*, *33*(2),  
734 261–304. doi:[10.1177/0049124104268644](https://doi.org/10.1177/0049124104268644) 780
- 735 Burnham, K. P., Anderson, D. R., & Huyvaert, K. P. (2011) 782  
736 AIC model selection and multimodel inference in  
737 behavioral ecology: Some background, observations,  
and comparisons. *Behavioral Ecology and Sociobiol- 783*  
*ogy*, *65*(1), 23–35. doi:[10.1007/s00265-010-1029-6](https://doi.org/10.1007/s00265-010-1029-6)
- Cacioppo, J. T., Berntson, G. G., Binkley, P. F., Quigley, K. S.,  
Uchino, B. N., & Fieldstone, A. (1994). Autonomic  
cardiac control. II. Noninvasive indices and basal  
response as revealed by autonomic blockades. *Psy- 784*  
*chophysiology*, *31*(6), 586–598. doi:[10.1111/j.1469-8986.1994.tb02351.x](https://doi.org/10.1111/j.1469-8986.1994.tb02351.x)
- Carlson, S. M., Moses, L. J., & Breton, C. (2002). How  
Specific is the Relation between Executive Function  
and Theory of Mind? Contributions of Inhibitory  
Control and Working Memory. *Infant and Child 785*  
*Development*, *11*(2), 73–92. doi:[10.1002/icd.298](https://doi.org/10.1002/icd.298)
- Cánovas, M., Domingues, A., & Sanches, J. M. (2011). Real  
Time HRV with smartphone System architecture. In  
*RecPad* (pp. 126–127).
- Coote, J. H. (2013). Myths and realities of the cardiac vagus.  
*The Journal of Physiology*, *591*(Pt 17), 4073–4085.  
doi:[10.1113/jphysiol.2013.257758](https://doi.org/10.1113/jphysiol.2013.257758)
- Craig, C. L., Marshall, A. L., Sjöström, M., Bauman, A.  
E., Booth, M. L., Ainsworth, B. E., . . . Oja, P.  
(2003). International physical activity questionnaire:  
12-country reliability and validity. *Medicine and 786*  
*Science in Sports and Exercise*, *35*(8), 1381–95.  
doi:[10.1249/01.MSS.0000078924.61453.FB](https://doi.org/10.1249/01.MSS.0000078924.61453.FB)
- Denver, J. W., Reed, S. F., & Porges, S. W. (2007). Method-  
ological issues in the quantification of respiratory  
sinus arrhythmia. *Biological Psychology*, *74*(2), 286–  
294. doi:[10.1016/j.biopsycho.2005.09.005](https://doi.org/10.1016/j.biopsycho.2005.09.005)
- Dimberg, U., Thunberg, M., & Elmehed, K. (2000). Uncon-  
scious facial reactions to emotional facial expres-  
sions. *Psychological Science : A Journal of the 787*  
*American Psychological Society / APS*, *11*(1), 86–89.  
doi:[10.1111/1467-9280.00221](https://doi.org/10.1111/1467-9280.00221)
- Ford, T. W., & McWilliam, P. N. (1986). The effects of electri-  
cal stimulation of myelinated and non-myelinated va-  
gal fibres on heart rate in the rabbit. *J Physiol*, *380*(1-  
2), 341–347. doi:[10.1113/jphysiol.1986.sp016289](https://doi.org/10.1113/jphysiol.1986.sp016289)
- Gallese, V., & Caruana, F. (2016). Embodied Simulation:  
Beyond the Expression/Experience Dualism of Emo-  
tions. *Trends in Cognitive Sciences*, *20*(6), 397–398.  
doi:[10.1016/j.tics.2016.03.010](https://doi.org/10.1016/j.tics.2016.03.010)
- García, C. A., Otero, A., Vila, X., & Márquez, D. G. (2013). A  
new algorithm for wavelet-based heart rate variabil-  
ity analysis. *Biomedical Signal Processing and Con-*

- 829  
830  
831  
832  
833  
834
- 835  
836  
837  
838  
839
- 840  
841  
842  
843  
844
- 845  
846  
847  
848
- 849  
850  
851  
852  
853
- 854  
855  
856  
857
- 858  
859  
860
- 861  
862  
863  
864
- 865  
866  
867  
868
- 869  
870  
871
- 872  
873  
874  
875
- 876  
877  
878
- 879  
880  
881  
882  
883  
884
- 885  
886  
887  
888  
889  
890  
891  
892  
893  
894  
895  
896  
897  
898  
899  
900  
901  
902  
903  
904  
905  
906  
907  
908  
909  
910  
911  
912  
913  
914  
915  
916  
917  
918  
919  
920  
921  
922  
923  
924  
925  
926  
927  
928
- trol*, 8(6), 542–550. doi:[10.1016/j.bspc.2013.05.006](https://doi.org/10.1016/j.bspc.2013.05.006)
- Hagströmer, M., Oja, P., & Sjöström, M. (2006). The International Physical Activity Questionnaire (IPAQ): a study of concurrent and construct validity. *Public Health Nutrition*, 9(06), 1127–1132. doi:[10.1079/PHN2005898](https://doi.org/10.1079/PHN2005898)
- Hansen, A. L., Johnsen, B. H., & Thayer, J. F. (2003). Vagal influence on working memory and attention. *International Journal of Psychophysiology*, 48(3), 263–274. doi:[10.1016/S0167-8760\(03\)00073-4](https://doi.org/10.1016/S0167-8760(03)00073-4)
- Hansen, A. L., Johnsen, B. H., Sollers, J. J., Stenvik, K., & Thayer, J. F. (2004). Heart rate variability and its relation to prefrontal cognitive function: The effects of training and detraining. *European Journal of Applied Physiology*, 93(3), 263–272. doi:[10.1007/s00421-004-1208-0](https://doi.org/10.1007/s00421-004-1208-0)
- Heathers, J. A. J. (2014). Everything Hertz: Methodological issues in short-term frequency-domain HRV. *Frontiers in Physiology*, 5 MAY(May), 177. doi:[10.3389/fphys.2014.00177](https://doi.org/10.3389/fphys.2014.00177)
- Hegyi, G., & Garamszegi, L. Z. (2011). Using information theory as a substitute for stepwise regression in ecology and behavior. *Behavioral Ecology and Sociobiology*, 65(1), 69–76. doi:[10.1007/s00265-010-1036-7](https://doi.org/10.1007/s00265-010-1036-7)
- Hewig, J., Hagemann, D., Seifert, J., Gollwitzer, M., Naumann, E., & Bartussek, D. (2005). Brief Report. *Cognition & Emotion*, 19(7), 1095–1109. doi:[10.1080/02699930541000084](https://doi.org/10.1080/02699930541000084)
- Heyes, C. (2014). Submentalizing: I Am Not Really Reading Your Mind. *Perspectives on Psychological Science*, 9(2), 131–143. doi:[10.1177/1745691613518076](https://doi.org/10.1177/1745691613518076)
- Heyes, C. (2016a). Blackboxing: social learning strategies and cultural evolution. *Philosophical Transactions of the Royal Society B: Biological Sciences*, 371(1693), 20150369. doi:[10.1098/rstb.2015.0369](https://doi.org/10.1098/rstb.2015.0369)
- Heyes, C. (2016b). Who Knows? Metacognitive Social Learning Strategies. *Trends in Cognitive Sciences*, 20(3), 204–213. doi:[10.1016/j.tics.2015.12.007](https://doi.org/10.1016/j.tics.2015.12.007)
- Heyes, C., & Pearce, J. M. (2015). Not-so-social learning strategies. *Proceedings of the Royal Society B: Biological Sciences*, 282(1802), 20141709–20141709. doi:[10.1098/rspb.2014.1709](https://doi.org/10.1098/rspb.2014.1709)
- Iorfino, F., Alvares, G. A., Guastella, A. J., & Quintana, D. S. (2016). Cold face test-induced increases in heart rate variability are abolished by engagement in a social cognition task. *Journal of Psychophysiology*, 30(1), 38–46. doi:[10.1027/0269-8803/a000152](https://doi.org/10.1027/0269-8803/a000152)
- Jack, R. E., & Schyns, P. G. (2015). The Human Face as a Dynamic Tool for Social Communication. *Current Biology*, 25(14), R621–R634. doi:[10.1016/j.cub.2015.05.052](https://doi.org/10.1016/j.cub.2015.05.052)
- Jack, R. E., Sun, W., Delis, I., Garrod, O. G. B., & Schyns, P. G. (2016). Four not six: Revealing culturally common facial expressions of emotion. *Journal of Experimental Psychology: General*, 145(6), 708–730. doi:[10.1037/xge0000162](https://doi.org/10.1037/xge0000162)
- Johnstone, J. A., Ford, P. A., Hughes, G., Watson, T., & Garrett, A. T. (2012a). Bioharness™ multivariable monitoring device: part. I: validity. *Journal of Sports Science & Medicine*, 11(3), 400–8.
- Johnstone, J. A., Ford, P. A., Hughes, G., Watson, T., & Garrett, A. T. (2012b). Bioharness™ Multivariable Monitoring Device: Part. II: Reliability. *Journal of Sports Science & Medicine*, 11(3), 409–17.
- Johnstone, J. A., Ford, P. A., Hughes, G., Watson, T., Mitchell, A. C. S., & Garrett, A. T. (2012). Field based reliability and validity of the bioharness™ multivariable monitoring device. *Journal of Sports Science & Medicine*, 11(4), 643–52.
- Jones, J. F. X., Wang, Y., & Jordan, D. (1995). Heart-rate responses to selective stimulation of cardiac vagal-c fibers in anesthetized cats, rats and rabbits. *Journal of Physiology (London)*, 489, 203–214.
- Jordan, D. (2005). Vagal control of the heart: central serotonergic (5-HT) mechanisms. *Exp. Physiol.*, 90(2), 175–181. doi:[10.1113/expphysiol.2004.029058](https://doi.org/10.1113/expphysiol.2004.029058)
- Kamath, M. V., & Fallen, E. L. (1993). Power spectral analysis of heart rate variability: a noninvasive signature of cardiac autonomic function. *Critical Reviews in Biomedical Engineering*, 21(3), 245–311. doi:[8243093](https://doi.org/10.1080/08933939308933933)
- Kamath, M. V., Upton, a R., Talalla, A., & Fallen, E. L. (1992). Effect of vagal nerve electrostimulation on the power spectrum of heart rate variability in man. *Pacing and Clinical Electrophysiology : PACE*, 15(2), 235–43. Retrieved from <http://onlinelibrary.wiley.com/doi/10.1111/j.1540-8159.1992.tb03067.x/abstract>
- Kamath, M. V., Upton, A. R. M., Talalla, A., & Fallen, E. L. (1992). Neurocardiac responses to vagoafferent electrostimulation in humans. *PACE - Pacing and Clinical Electrophysiology*, 15(10 II), 1581–1587.



- 875 doi:[10.1111/j.1540-8159.1992.tb02937.x](https://doi.org/10.1111/j.1540-8159.1992.tb02937.x) 922
- 876 Kass, R., & Raftery, A. (1995). Bayes Factors. *Journal of the* 923  
877 *American Statistical Association*, 90(430), 773–795. 924  
878 doi:[10.1080/01621459.1995.10476572](https://doi.org/10.1080/01621459.1995.10476572) 925
- 879 Keltner, D., Kogan, A., Piff, P. K., & Saturn, S. R. (2014). 926  
880 The sociocultural appraisals, values, and emotions 927  
881 (SAVE) framework of prosociality: core processes 928  
882 from gene to meme. *Annual Review of Psychology* 929  
883 65, 425–60. doi:[10.1146/annurev-psych-010213-115054](https://doi.org/10.1146/annurev-psych-010213-115054) 930  
884 115054 931
- 885 Kemper, K. J., Hamilton, C., & Atkinson, M. (2007). 932  
886 Heart rate variability: Impact of differences in 933  
887 outlier identification and management strategies 934  
888 on common measures in three clinical popu- 935  
889 lations. *Pediatric Research*, 62(3), 337–342. 936  
890 doi:[10.1203/PDR.0b013e318123fbc](https://doi.org/10.1203/PDR.0b013e318123fbc) 937
- 891 Kimhy, D., Crowley, O. V., McKinley, P. S., Burg, M. M., 938  
892 Lachman, M. E., Tun, P. A., . . . Sloan, R. P. (2013). 939  
893 The association of cardiac vagal control and execu- 940  
894 tive functioning - Findings from the MIDUS study. 941  
895 *Journal of Psychiatric Research*, 47(5), 628–635. 942  
896 doi:[10.1016/j.jpsychires.2013.01.018](https://doi.org/10.1016/j.jpsychires.2013.01.018) 943
- 897 Kobayashi, H. (2009). Does paced breathing improve the re- 944  
898 producibility of heart rate variability measurements? 945  
899 *Journal of Physiological Anthropology*, 28(5), 225– 946  
900 230. doi:[10.2114/jpa2.28.225](https://doi.org/10.2114/jpa2.28.225) 947
- 901 Kowalewski, M. A., & Urban, M. (2004). Short-and 948  
902 long-term reproducibility of autonomic measures 949  
903 in supine and standing positions. *Clinical Science*, 950  
904 106(1), 61–66. doi:[10.1042/CS20030119](https://doi.org/10.1042/CS20030119) 951
- 905 Lane, R. D., McRae, K., Reiman, E. M., Chen, K., Ahern, G., 952  
906 L., & Thayer, J. F. (2009). Neural correlates of heart 953  
907 rate variability during emotion. *NeuroImage*, 44(1), 954  
908 213–222. doi:[10.1016/j.neuroimage.2008.07.056](https://doi.org/10.1016/j.neuroimage.2008.07.056) 955
- 909 Larsen, P. D., Tzeng, Y. C., Sin, P. Y. W., & Galletly, D. C. 956  
910 (2010). Respiratory sinus arrhythmia in conscious 957  
911 humans during spontaneous respiration. *Respiratory* 958  
912 *Physiology and Neurobiology*, 174(1-2), 111–118. 959  
913 doi:[10.1016/j.resp.2010.04.021](https://doi.org/10.1016/j.resp.2010.04.021) 960
- 914 Lin, S., Keysar, B., & Epley, N. (2010). Reflexively 961  
915 mindblind: Using theory of mind to interpret be- 962  
916 havior requires effortful attention. *Journal of* 963  
917 *Experimental Social Psychology*, 46(3), 551–556. 964  
918 doi:[10.1016/j.jesp.2009.12.019](https://doi.org/10.1016/j.jesp.2009.12.019) 965
- 919 Lovibond, P. F., & Lovibond, S. H. (1995). The struc- 966  
920 ture of negative emotional states: Comparison of 967  
921 the depression anxiety stress scales (DASS) with 968
- the Beck Depression and Anxiety Inventories. *Be- 969  
haviour Research and Therapy*, 33(3), 335–343.  
doi:[10.1037/1040-3590.10.2.176](https://doi.org/10.1037/1040-3590.10.2.176)
- Lumma, A. L., Kok, B. E., & Singer, T. (2015). Is medita- 970  
tion always relaxing? Investigating heart rate, heart 971  
rate variability, experienced effort and likeability 972  
during training of three types of meditation. *Inter- 973  
national Journal of Psychophysiology*, 97(1), 38–45.  
doi:[10.1016/j.ijpsycho.2015.04.017](https://doi.org/10.1016/j.ijpsycho.2015.04.017)
- Mier, D., Lis, S., Neuthe, K., Sauer, C., Esslinger, C., 974  
Gallhofer, B., & Kirsch, P. (2010). The involve- 975  
ment of emotion recognition in affective theory 976  
of mind. *Psychophysiology*, 47(6), 1028–1039.  
doi:[10.1111/j.1469-8986.2010.01031.x](https://doi.org/10.1111/j.1469-8986.2010.01031.x)
- Miller, J. G., Kahle, S., & Hastings, P. D. (2015). 977  
Roots and Benefits of Costly Giving: Children 978  
Who Are More Altruistic Have Greater Auto- 979  
nomic Flexibility and Less Family Wealth. *Psy- 980  
chological Science*, 26(7), 0956797615578476.  
doi:[10.1177/0956797615578476](https://doi.org/10.1177/0956797615578476)
- Mitchell, R. L. C., & Phillips, L. H. (2015). The over- 981  
lapping relationship between emotion perception 982  
and theory of mind. *Neuropsychologia*, 70, 1–10.  
doi:[10.1016/j.neuropsychologia.2015.02.018](https://doi.org/10.1016/j.neuropsychologia.2015.02.018)
- Muhtadie, L., Koslov, K., Akinola, M., & Mendes, W. 983  
B. (2015). Vagal flexibility: A physiological 984  
predictor of social sensitivity. *Journal of Per- 985  
sonality and Social Psychology*, 109(1), 106–120.  
doi:[10.1037/pspp0000016](https://doi.org/10.1037/pspp0000016)
- Neuberg, S. L., Kenrick, D. T., & Schaller, M. 986  
(2011). Human threat management systems: Self- 987  
protection and disease avoidance. *Neuroscience 988  
and Biobehavioral Reviews*, 35(4), 1042–1051.  
doi:[10.1016/j.neubiorev.2010.08.011](https://doi.org/10.1016/j.neubiorev.2010.08.011)
- Niedenthal, P. M. (2007). Embodying emo- 989  
tion. *Science*, 316(5827), 1002–1005.  
doi:[10.1126/science.1136930](https://doi.org/10.1126/science.1136930)
- Park, G., & Thayer, J. F. (2014). From the heart to the 990  
mind: Cardiac vagal tone modulates top-down and 991  
bottom-up visual perception and attention to emo- 992  
tional stimuli. *Frontiers in Psychology*, 5(MAY), 993  
278. doi:[10.3389/fpsyg.2014.00278](https://doi.org/10.3389/fpsyg.2014.00278)
- Park, G., Van Bavel, J. J., Vasey, M. W., Egan, E. J. L., 994  
& Thayer, J. F. (2012). From the heart to the 995  
mind's eye: Cardiac vagal tone is related to vi- 996  
sual perception of fearful faces at high spatial fre- 997  
quency. *Biological Psychology*, 90(2), 171–178.

- doi:[10.1016/j.biopsycho.2012.02.012](https://doi.org/10.1016/j.biopsycho.2012.02.012) 1015
- 969  
970 Park, G., Vasey, M. W., Van Bavel, J. J., & Thayer, J. F. (2013).  
971 Cardiac vagal tone is correlated with selective atten-  
972 tion to neutral distractors under load. *Psychophysiology*,  
973 *50*(4), 398–406. doi:[10.1111/psyp.12029](https://doi.org/10.1111/psyp.12029) 1016
- 974 Piferi, R. L., Kline, K. A., Younger, J., & Lawler, K. A. (2000).  
975 An alternative approach for achieving cardiovascular  
976 baseline: Viewing an aquatic video. *International Journal of Psychophysiology*,  
977 *37*(2), 207–217. doi:[10.1016/S0167-8760\(00\)00102-1](https://doi.org/10.1016/S0167-8760(00)00102-1) 1017  
1018  
1019
- 979 Pinna, G. D., Maestri, R., Torunski, A., Danilowicz-  
980 Szymanowicz, L., Szwoch, M., La Rovere, M. T., &  
981 Raczak, G. (2007). Heart rate variability measures:  
982 a fresh look at reliability. *Clinical Science*, *113*(3),  
983 131–40. doi:[10.1042/CS20070055](https://doi.org/10.1042/CS20070055) 1020  
1021  
1022  
1023  
1024  
1025
- 984 Poletti, M., Enrici, I., & Adenzato, M. (2012). Cognitive  
985 and affective Theory of Mind in neurodegenerative  
986 diseases: Neuropsychological, neuroanatomical and  
987 neurochemical levels. *Neuroscience and Biobehavioral Reviews*,  
988 *36*(9), 2147–2164. doi:[10.1016/j.neubiorev.2012.07.004](https://doi.org/10.1016/j.neubiorev.2012.07.004) 1026  
1027  
1028  
1029  
1030  
1031  
1032  
1033  
1034  
1035  
1036
- 990 Porges, S. W. (1995). Cardiac vagal tone: A physiological  
991 index of stress. *Neuroscience and Biobehavioral Reviews*,  
992 *19*(2), 225–233. doi:[10.1016/0149-7634\(94\)00066-A](https://doi.org/10.1016/0149-7634(94)00066-A) 1037  
1038  
1039  
1040
- 994 Porges, S. W. (1997). Emotion: An evolutionary by-  
995 product of the neural regulation of the autonomic  
996 nervous system. *Annals of the New York Academy of Sciences*,  
997 *807*(1 Integrative N), 62–77. doi:[10.1111/j.1749-6632.1997.tb51913.x](https://doi.org/10.1111/j.1749-6632.1997.tb51913.x) 1041  
1042  
1043  
1044  
1045
- 999 Porges, S. W. (1998). Love: An emergent property  
1000 of the mammalian autonomic nervous system. *Psychoneuroendocrinology*,  
1001 *23*(8), 837–861. doi:[10.1016/S0306-4530\(98\)00057-2](https://doi.org/10.1016/S0306-4530(98)00057-2) 1046  
1047  
1048  
1049
- 1003 Porges, S. W. (2001). The polyvagal theory: Phylogenetic  
1004 substrates of a social nervous system. *International Journal of Psychophysiology*,  
1005 *42*(2), 123–146. doi:[10.1016/S0167-8760\(01\)00162-3](https://doi.org/10.1016/S0167-8760(01)00162-3) 1050  
1051  
1052  
1053
- 1007 Porges, S. W. (2003). The Polyvagal Theory: Phylogenetic  
1008 contributions to social behavior. *Physiology and Behavior*,  
1009 *79*(3), 503–513. doi:[10.1016/S0031-9384\(03\)00156-2](https://doi.org/10.1016/S0031-9384(03)00156-2) 1054  
1055  
1056  
1057
- 1011 Porges, S. W. (2007). The polyvagal perspective. *Biological Psychology*,  
1012 *74*(2), 116–143. doi:[10.1016/j.biopsycho.2006.06.009](https://doi.org/10.1016/j.biopsycho.2006.06.009) 1058  
1059  
1060
- 1014 Porges, S. W., Cohn, J., Bal, E., & Lamb, D. (2007).  
The Dynamic Affect Recognition Evaluation software. Brain-Body Center, University of Illinois at Chicago. Retrieved from <http://www.polyvagalscience.com/index.php/software/dynamic-affect-recognition-evaluation-dare>
- Prinsloo, G. E., Rauch, H. G. L., Lambert, M. I., Muench, F., Noakes, T. D., & Derman, W. E. (2011). The effect of short duration heart rate variability (HRV) biofeedback on cognitive performance during laboratory induced cognitive stress. *Applied Cognitive Psychology*, *25*(5), 792–801. doi:[10.1002/acp.1750](https://doi.org/10.1002/acp.1750)
- Quintana, D. S., & Heathers, J. A. J. (2014). Considerations in the assessment of heart rate variability in biobehavioral research. *Frontiers in Psychology*, *5*(JUL), 1–10. doi:[10.3389/fpsyg.2014.00805](https://doi.org/10.3389/fpsyg.2014.00805)
- Quintana, D. S., Guastella, A. J., Outhred, T., Hickie, I. B., & Kemp, A. H. (2012). Heart rate variability is associated with emotion recognition: Direct evidence for a relationship between the autonomic nervous system and social cognition. *International Journal of Psychophysiology*, *86*(2), 168–172. doi:[10.1016/j.ijpsycho.2012.08.012](https://doi.org/10.1016/j.ijpsycho.2012.08.012)
- Ramasawmy, S., & Gilles, P. Y. (2012). The internal and external validities of the Depression Anxiety Stress Scales (DASS-21). *International Journal of Psychology*, *47*(sup1), 1–41. doi:[10.1080/00207594.2012.709085](https://doi.org/10.1080/00207594.2012.709085)
- Reeck, C., Ames, D. R., & Ochsner, K. N. (2016). The Social Regulation of Emotion: An Integrative, Cross-Disciplinary Model. *Trends in Cognitive Sciences*, *20*(1), 47–63. doi:[10.1016/j.tics.2015.09.003](https://doi.org/10.1016/j.tics.2015.09.003)
- Rodríguez-Liñares, L., Méndez, A., Lado, M., Olivieri, D., Vila, X., & Gómez-Conde, I. (2011). An open source tool for heart rate variability spectral analysis. *Computer Methods and Programs in Biomedicine*, *103*(1), 39–50. doi:[10.1016/j.cmpb.2010.05.012](https://doi.org/10.1016/j.cmpb.2010.05.012)
- Salanave, B., Vernay, M., Szego, E., Malon, A., Deschamps, V., Hercberg, S., & Castetbon, K. (2012). Physical activity patterns in the French 18-74-year-old population: French Nutrition and Health Survey (Etude Nationale Nutrition Santé, ENNS) 2006-2007. *Public Health Nutrition*, *15*(11), 2054–9. doi:[10.1017/S1368980012003278](https://doi.org/10.1017/S1368980012003278)
- Samson, D. (2009). Reading other people’s mind: insights from neuropsychology. *Journal of Neuropsychology*, *3*(Pt 1), 3–16. doi:[10.1348/174866408X377883](https://doi.org/10.1348/174866408X377883)
- Schaefer, A., Nils, F. F., Sanchez, X., & Philippot, P. (2010).

- 1062 Assessing the effectiveness of a large database of  
1063 emotion-eliciting films: A new tool for emotion re-  
1064 searchers. *Cognition & Emotion*, 24(7), 1153–1172.  
1065 doi:[10.1080/02699930903274322](https://doi.org/10.1080/02699930903274322)
- 1066 Schalk, J. van der, Hawk, S. T., Fischer, A. H., & Doosje,  
1067 B. (2011). Moving faces, looking places: Val-  
1068 idation of the Amsterdam Dynamic Facial Ex-  
1069 pression Set (ADFES). *Emotion*, 11(4), 907–920.  
1070 doi:[10.1037/a0023853](https://doi.org/10.1037/a0023853)
- 1071 Schurz, M., Radua, J., Aichhorn, M., Richlan, F., & Perner,  
1072 J. (2014). Fractionating theory of mind: A meta-  
1073 analysis of functional brain imaging studies. *Neu-  
1074 roscience and Biobehavioral Reviews*, 42, 9–34.  
1075 doi:[10.1016/j.neubiorev.2014.01.009](https://doi.org/10.1016/j.neubiorev.2014.01.009)
- 1076 Sherwood, C. C. (2005). Comparative anatomy of the facial  
1077 motor nucleus in mammals, with an analysis of neu-  
1078 ron numbers in primates. *Anatomical Record - Part A  
1079 Discoveries in Molecular, Cellular, and Evolutionary  
1080 Biology*, 287(1), 1067–1079. doi:[10.1002/ar.a.20259](https://doi.org/10.1002/ar.a.20259)
- 1081 Simmons, J. P., Nelson, L. D., & Simonsohn, U. (2012).  
1082 A 21 word solution. *SPSP Dialogue*, 1–4.  
1083 doi:[10.2139/ssrn.2160588](https://doi.org/10.2139/ssrn.2160588)
- 1084 Singer, T., & Klimecki, O. M. (2014). Empathy and com-  
1085 passion. *Current Biology*, 24(18), R875–R878.  
1086 doi:[10.1016/j.cub.2014.06.054](https://doi.org/10.1016/j.cub.2014.06.054)
- 1087 Snipes, M., & Taylor, D. C. (2014). Model selection and  
1088 Akaike Information Criteria: An example from wine  
1089 ratings and prices. *Wine Economics and Policy*, 3(1),  
1090 3–9. doi:[10.1016/j.wep.2014.03.001](https://doi.org/10.1016/j.wep.2014.03.001)
- 1091 Spoor, J. R., & Kelly, J. R. (2004). The evolutionary signifi-  
1092 cance of affect in groups: Communication and group  
1093 bonding. *Group Processes & Intergroup Relations*,  
1094 7(4), 398–412. doi:[10.1177/1368430204046145](https://doi.org/10.1177/1368430204046145)
- 1095 Symonds, M. R. E., & Moussalli, A. (2011). A brief guide  
1096 to model selection, multimodel inference and model  
1097 averaging in behavioural ecology using Akaike's  
1098 information criterion. *Behavioral Ecology and So-  
1099 ciobiology*, 65(1), 13–21. doi:[10.1007/s00265-010-  
1100 1037-6](https://doi.org/10.1007/s00265-010-1037-6)
- 1101 Taborsky, B., & Oliveira, R. F. (2012). Social com-  
1102 petence: An evolutionary approach. *Trends  
1103 in Ecology and Evolution*, 27(12), 679–688.  
1104 doi:[10.1016/j.tree.2012.09.003](https://doi.org/10.1016/j.tree.2012.09.003)
- 1105 Task Force of the European Society of Cardiology the  
1106 North American Society of Pacing Electrophysiol-  
1107 ogy. (1996). Guidelines Heart rate variability. *Euro-  
1153*
- 1154 *pean Heart Journal*, 17, 354–381.
- Thayer, J. F., & Lane, R. D. (2000). A model of neuro-  
visceral integration in emotion regulation and dys-  
regulation. *Journal of Affective Disorders*, 61(3),  
201–216. doi:[10.1016/S0165-0327\(00\)00338-4](https://doi.org/10.1016/S0165-0327(00)00338-4)
- Thayer, J. F., & Lane, R. D. (2009). Claude Bernard  
and the heart-brain connection: Further elab-  
oration of a model of neurovisceral integration. *Neu-  
roscience and Biobehavioral Reviews*, 33(2), 81–88.  
doi:[10.1016/j.neubiorev.2008.08.004](https://doi.org/10.1016/j.neubiorev.2008.08.004)
- Thayer, J. F., & Sternberg, E. (2006). Beyond heart rate vari-  
ability: Vagal regulation of allostatic systems. *Annals of the New York Academy of Sciences*, 1088(1),  
361–372. doi:[10.1196/annals.1366.014](https://doi.org/10.1196/annals.1366.014)
- Thayer, J. F., Åhs, F., Fredrikson, M., Sollers, J. J., & Wager,  
T. D. (2012). A meta-analysis of heart rate variability  
and neuroimaging studies: Implications for heart rate  
variability as a marker of stress and health. *Neuro-  
science and Biobehavioral Reviews*, 36(2), 747–756.  
doi:[10.1016/j.neubiorev.2011.11.009](https://doi.org/10.1016/j.neubiorev.2011.11.009)
- Tracy, J. L., & Robins, R. W. (2008). The automatic-  
ity of emotion recognition. *Emotion*, 8(1), 81–95.  
doi:[10.1037/1528-3542.8.1.81](https://doi.org/10.1037/1528-3542.8.1.81)
- Tracy, J. L., Robins, R. W., & Schriber, R. A. (2009). De-  
velopment of a FACS-verified set of basic and self-  
conscious emotion expressions. *Emotion*, 9(4), 554–  
559. doi:[10.1037/a0015766](https://doi.org/10.1037/a0015766)
- Van Overwalle, F. (2009). Social cognition and the brain: A  
meta-analysis. *Human Brain Mapping*, 30(3), 829–  
858. doi:[10.1002/hbm.20547](https://doi.org/10.1002/hbm.20547)
- Villarejo, M., Zapirain, B., & Zorrilla, A. (2013). Algorithms  
Based on CWT and Classifiers to Control Cardiac  
Alterations and Stress Using an ECG and a SCR. *Sen-  
sors*, 13(5), 6141–6170. doi:[10.3390/s130506141](https://doi.org/10.3390/s130506141)
- Ward, A., & Webster, M. (2016). *Sociality: The Behaviour  
of Group-Living Animals*. Cham: Springer Interna-  
tional Publishing. doi:[10.1007/978-3-319-28585-6](https://doi.org/10.1007/978-3-319-28585-6)
- Wells, R., Outhred, T., Heathers, J. A. J., Quintana, D.  
S., & Kemp, A. H. (2012). Matter Over Mind:  
A Randomised-Controlled Trial of Single-Session  
Biofeedback Training on Performance Anxiety and  
Heart Rate Variability in Musicians. *PLoS ONE*,  
7(10), e46597. doi:[10.1371/journal.pone.0046597](https://doi.org/10.1371/journal.pone.0046597)
- Wood, A., Rychlowska, M., Korb, S., & Niedenthal, P. M.  
(2016). Fashioning the Face: Sensorimotor Sim-  
ulation Contributes to Facial Expression Recogni-



1154 tion. *Trends in Cognitive Sciences*, 20(3), 227–240.  
1155 doi:[10.1016/j.tics.2015.12.010](https://doi.org/10.1016/j.tics.2015.12.010)

1156 Yoon, J. H., Shah, R. S., Arnoudse, N. M., & De La  
1157 Garza, R. (2014). Remote physiological monitor-  
1158 ing of acute cocaine exposure. *Journal of Med-  
1159 ical Engineering & Technology*, 38(5), 244–250.  
1160 doi:[10.3109/03091902.2014.902513](https://doi.org/10.3109/03091902.2014.902513)

1161 Zephyr. (2014). Zephyr. Retrieved from [https://www.  
1162 zephyranywhere.com](https://www.zephyranywhere.com)
